# Supplementary material
Source: HighWire-hosted journal article supplement (https://rmdopen.bmj.com/content/6/3/e001392)
Supplement: inline-supplementary-material-1 [file inline-supplementary-material-1.pdf]

**Supplementary material for:**

**The risk of venous thromboembolism in immune-mediated inflammatory diseases: a UK matched cohort study**

**Authors: James Galloway, Kevin Barrett, Peter Irving, Kaivan Khavandi, Monica Nijher, Ruth Nicholson, Simon de Lusignan, Maya H Buch**

**Supplementary Figure 1: Cumulative incidence of PE and DVT in individuals with an immune-mediated inflammatory diseases compared to matched controls.**

**A) Cumulative incidence of PE**

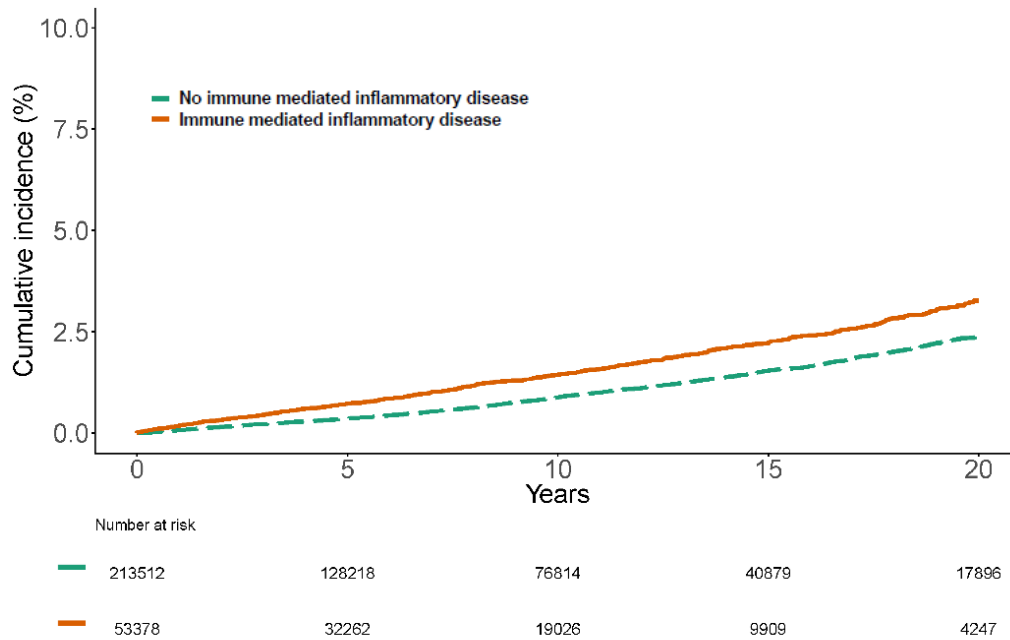

**B) Cumulative incidence of DVT**

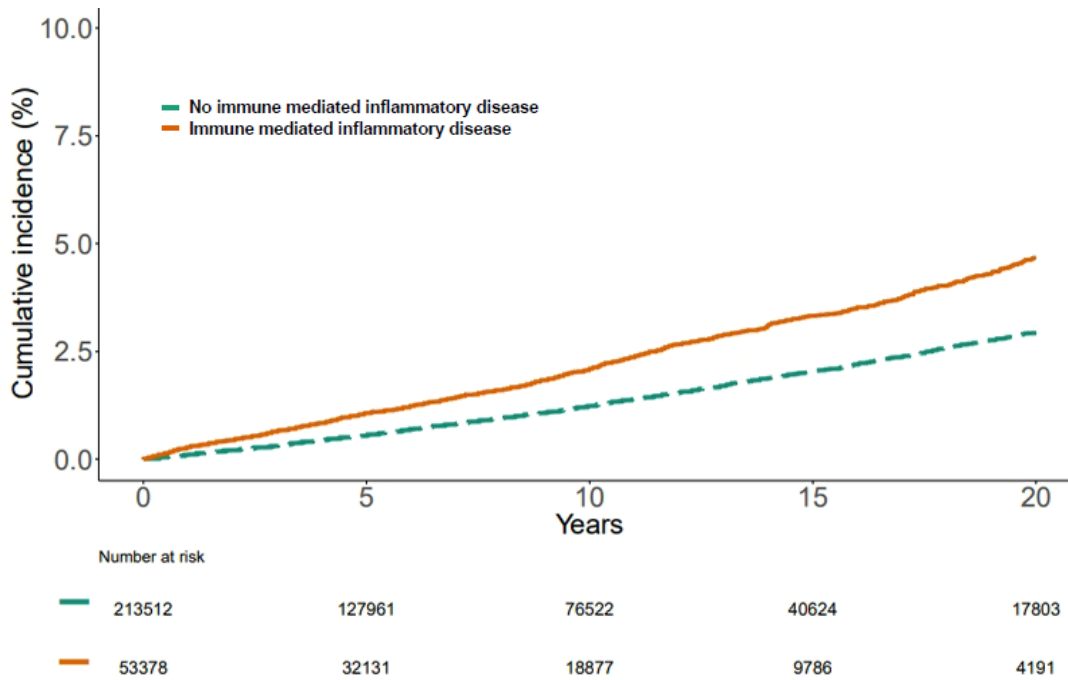

**S1 Table. Sensitivity analysis: associations between immune-mediated inflammatory diseases (IMID) and VTE with study follow up starting in 2004 (post-QOF period)**

|                                     | No.    | Patient<br>years at<br>risk | Events | Hazard ratio (95% CI)   |                         |
|-------------------------------------|--------|-----------------------------|--------|-------------------------|-------------------------|
|                                     |        |                             |        | Unadjusted              | Adjusted*               |
| <b>Primary outcome: time to VTE</b> |        |                             |        |                         |                         |
| All IMID                            |        |                             |        |                         |                         |
| Unexposed                           | 212985 | 1566469                     | 3558   | 1.00 (ref)              | 1.00 (ref)              |
| Exposed                             | 53191  | 391395                      | 1375   | <b>1.55 (1.46-1.65)</b> | <b>1.40 (1.31-1.51)</b> |

\*Adjusted for age, sex, IMD quintile, white ethnicity, BMI category, smoking status, alcohol category, hypertension, hyperlipidaemia, type 2 diabetes, peripheral arterial disease, atrial fibrillation, myocardial infarction, stroke, heart failure, chronic kidney disease stage 3-5, chronic obstructive pulmonary disorder, chronic liver disease, malignancy, reduced mobility, thrombophilia, family history of VTE, use of hormone therapy, immunotherapy, corticosteroids, statins and baseline platelet count.
